# Supplementary material for: Time-dependent evolution of the nitrogen configurations in N-doped graphene films
Source: Royal Society of Chemistry journal article supplement (doi:10.1039/c6ra24094a), 2016-01-01
Supplement: c6ra24094a1.pdf [file c6ra24094a1.pdf]

## Supplementary Information

### Time-dependent evolution of the nitrogen configuration in N-doped graphene films

Boitumelo Matsoso<sup>1,2</sup>, Kamalakannan Ranganathan<sup>1,2</sup>, Bridget K Mutuma<sup>1,2</sup>, Tsenolo Lerotholi<sup>2</sup>, Glenn Jones<sup>3,4</sup> and Neil J Coville<sup>1,2\*</sup>

<sup>1</sup>DST-NRF Centre of Excellence in Strong Materials and <sup>2</sup>Molecular Sciences Institute, School of Chemistry, University of the Witwatersrand, 2050, Johannesburg, South Africa

<sup>3</sup>Department of Chemistry, University College London, Gordon Street, London, UK

<sup>4</sup>Johnson Matthey Technology Center, Building 22, CSIR Campus, Meiring Naude Road, Brummeria, Pretoria, 0184, South Africa.

#### *Synthesis and transfer of pristine and N-doped graphene films*

All films were grown on a Cu foil using the atmospheric pressure CVD (APCVD). Initially, the Cu foil was cleaned by using an electrochemical cell with an electrolyte solution made from 300 mL distilled water, 150 mL ethanol, 150 mL ortho-phosphoric acid, 30 mL isopropanol and 3.0 g urea<sup>38</sup>. After cleaning, the Cu foil was placed at the centre of the cylindrical quartz tube inside a horizontal furnace. The furnace was heated to 1000 °C and then held at the designated temperature for 30 minutes. Growth of the N-doped graphene films was carried out at 2, 5, 10, and 20 min under 10 sccm flow rate of CH<sub>4</sub> and 5 sccm of NH<sub>3</sub>. Similarly, pristine graphene films were grown using 10 sccm CH<sub>4</sub> at 2, 5, 10, 20 min. Finally the reactor was *rapidly* cooled to room temperature by pushing the quartz tube outside the reactor. The as-grown pristine and N-doped graphene films were then transferred onto a 300 nm SiO<sub>2</sub>/Si substrate using the PMMA-assisted electrochemical delamination method<sup>38</sup>.

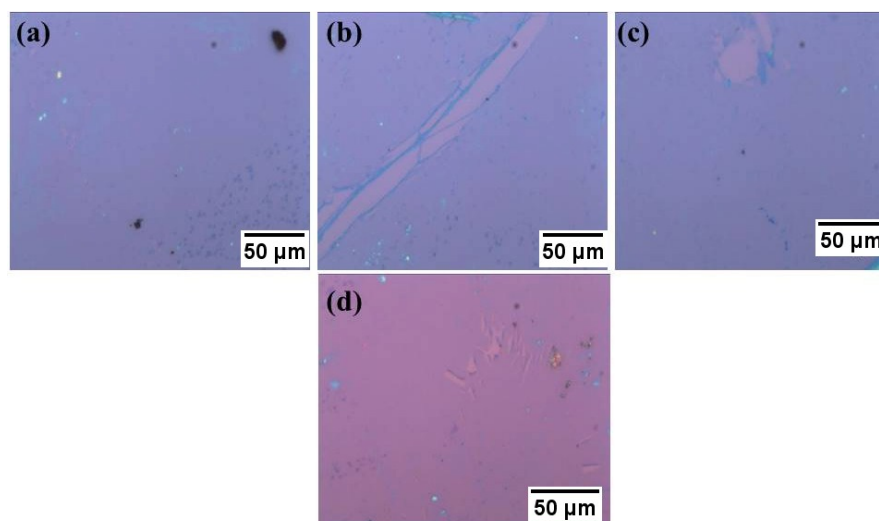

**Fig S1:** Optical images of pristine graphene films grown (a) 2 min, (b) 5 min, (c) 10 min, and (d) 20 min growth times.

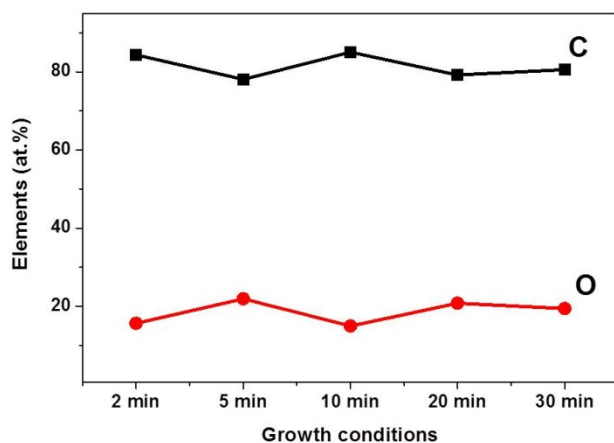

| Sample | Elemental compositions (at. %) |      |
|--------|--------------------------------|------|
|        | C                              | O    |
| 2 min  | 84.4                           | 15.6 |
| 5 min  | 78.1                           | 21.9 |
| 10 min | 85.1                           | 14.9 |
| 20 min | 79.2                           | 20.8 |

**Fig S2:** Elemental plot and table of atomic compositions of pristine graphene films.

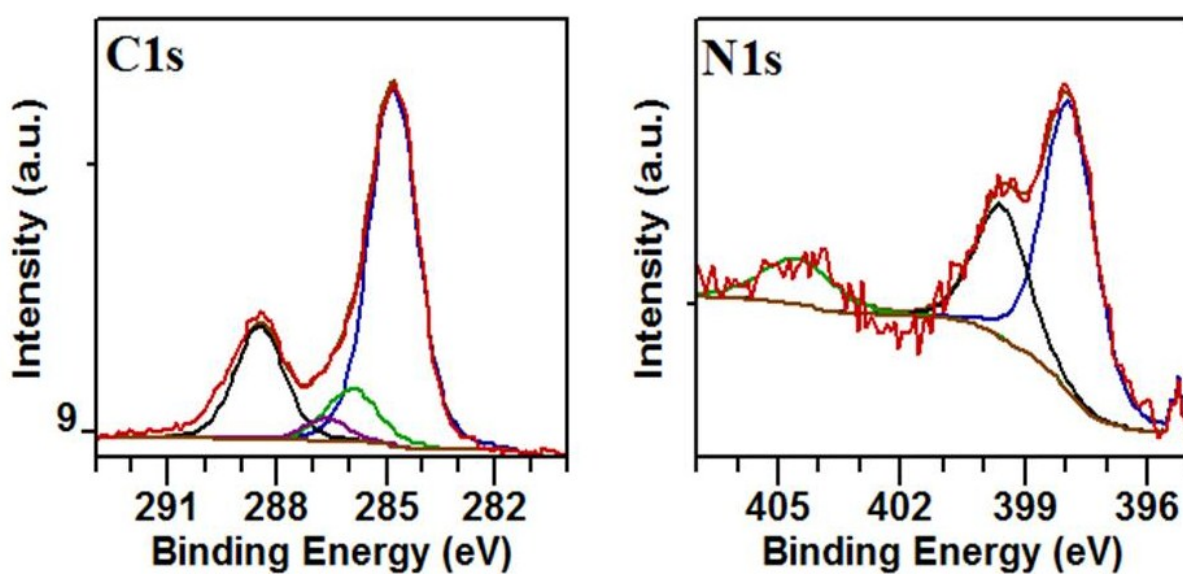

**Fig S3:** Core-shell XPS spectra of N-doped graphene films grown at 2 min with 10 sccm  $\text{CH}_4$  and 5 sccm  $\text{NH}_3$ .

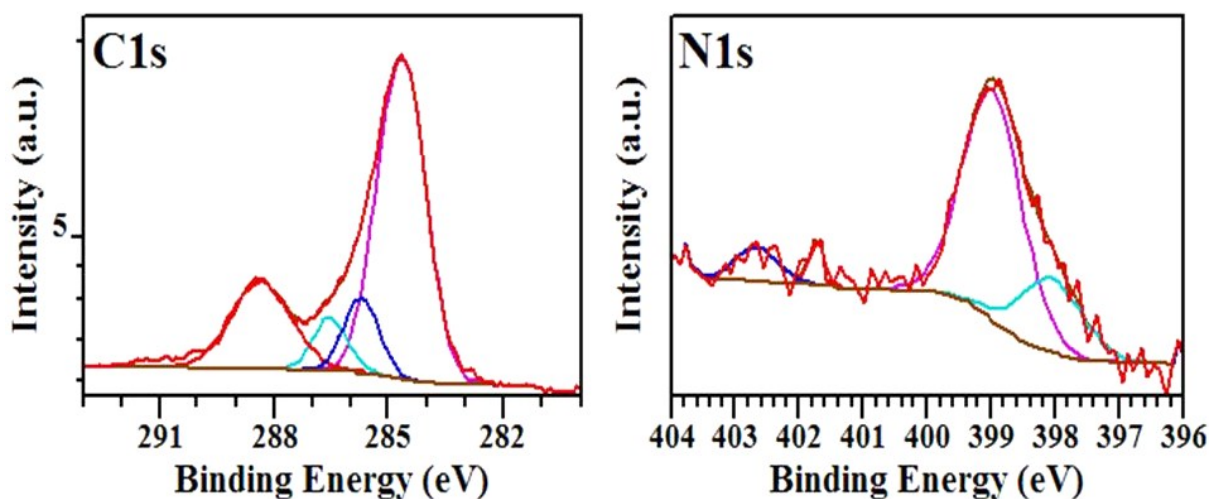

**Fig S4:** Core-shell XPS spectra of N-doped graphene films grown at 5 min with 10 sccm CH<sub>4</sub> and 5 sccm NH<sub>3</sub>.

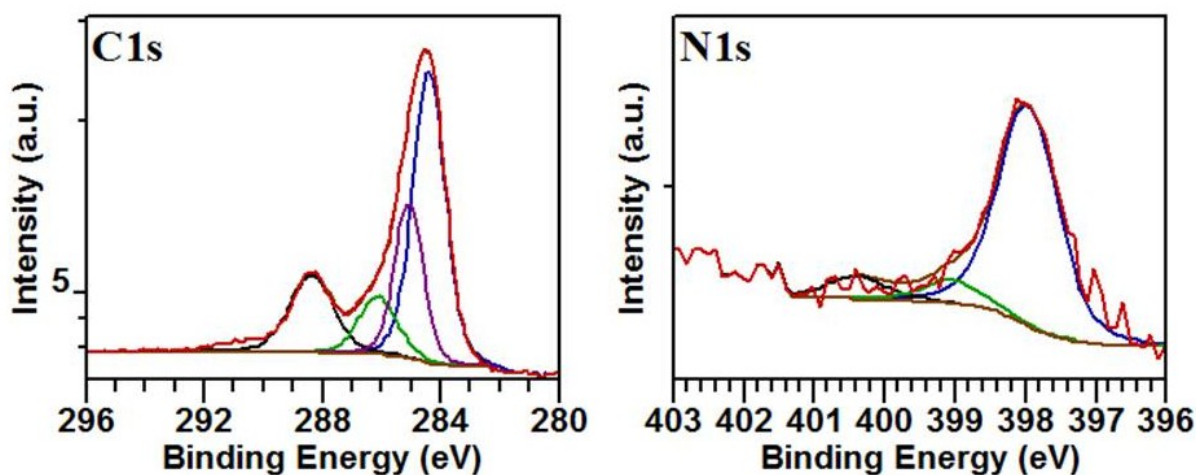

**Fig S5:** Core-shell XPS spectra of N-doped graphene films grown at 20 min with 10 sccm CH<sub>4</sub> and 5 sccm NH<sub>3</sub>.

**Table S1:** Atomic compositions of N-doped graphene films

| Sample        | N-configurations/ N-content (N/C at. %) |            |             |                 |
|---------------|-----------------------------------------|------------|-------------|-----------------|
|               | Pyridinic-N                             | Pyrrolic-N | Graphitic-N | NO <sub>x</sub> |
| <b>2 min</b>  | 2.79                                    | 1.28       | 0           | 0.61            |
| <b>5 min</b>  | 0.82                                    | 2.51       | 0.13        | 0.28            |
| <b>10 min</b> | 1.24                                    | 0.081      | 1.83        | 0.11            |
| <b>20 min</b> | 2.36                                    | 0.24       | 0.24        | 0               |
